# Supplementary material
Source: ML conference proceedings conference paper supplement (https://openaccess.thecvf.com/content/CVPR2026/html/Han_HERO_Hierarchical_Embedding-Refinement_CVPR_2026_paper.html)
Supplement: Supplementary file 1 [file Appendix.pdf › cvpr-pack/Appendix.pdf]

# HERO: Hierarchical Embedding-Refinement for Open-Vocabulary Temporal Sentence Grounding in Videos

## Supplementary Material

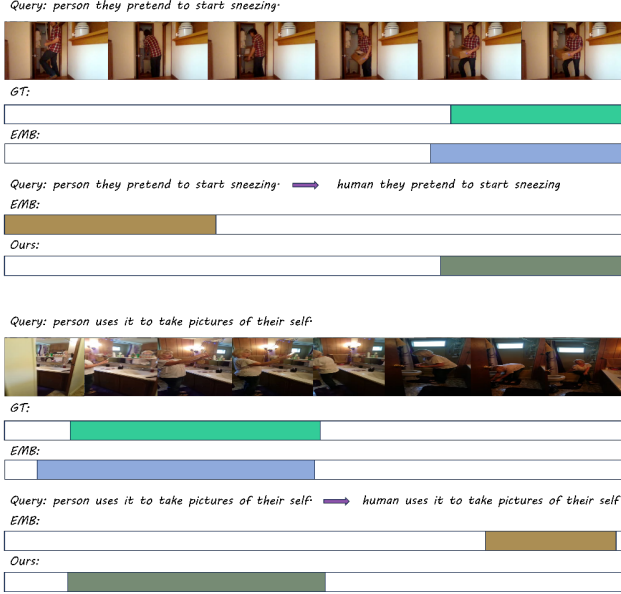

Figure 1. Per-sample performance comparison between our method and the EMB baseline on Charades-OV dataset.

## 1. Additional Experimental Results

### 1.1. Result on Charades-CD

Table 1 summarizes the performance of different methods on the Charades-CD dataset. As shown, our proposed HERO achieves the best results across both evaluation metrics, reaching 51.59% at R1@0.5 and 30.84% at R1@0.7. These results outperform the second-best results, which are 49.36% and 27.76%, by absolute margins of 2.23% and 3.08%, respectively. Notably, HERO surpasses strong DETR-style models such as TR-DETR and QD-DETR, as well as prior alignment-based methods like VSLNet and LG, demonstrating its superior capability in handling distribution shifts inherent in the Charades-CD benchmark.

### 1.2. Result on ActivityNet Captions

Table 2 reports the performance of various methods on the ActivityNet Captions dataset. HERO achieves the best results, attaining 46.14% at R1@0.5 and 27.89% at R1@0.7, outperforming all prior approaches across both metrics. These results further validate that HERO not only excels in open-vocabulary scenarios but also delivers strong performance under standard grounding settings.

Table 1. Experimental results on the Charades-CD dataset. **Bold/underlined** fonts indicate the best/second-best results.

| Method             | R1@0.5       | R1@0.7       |
|--------------------|--------------|--------------|
| 2D-TAN [12]        | 35.88        | 13.91        |
| LG [6]             | 42.90        | 19.29        |
| DRN [10]           | 31.11        | 15.17        |
| DCM [9]            | 45.57        | 22.70        |
| Moment-DETR [3]    | 42.31        | 18.31        |
| VSLNet [11]        | 44.41        | 24.83        |
| EMB [2]            | 48.00        | <u>27.76</u> |
| HLTI [1]           | 46.67        | 27.08        |
| QD-DETR [5]        | 49.19        | 22.04        |
| TR-DETR [7]        | 49.36        | 24.36        |
| <b>HERO (Ours)</b> | <b>51.59</b> | <b>30.84</b> |

Table 2. Experimental results on the ActivityNet Captions dataset. **Bold/underlined** fonts indicate the best/second-best results.

| Method             | R1@0.5       | R1@0.7       |
|--------------------|--------------|--------------|
| QSPN [8]           | 27.70        | 13.60        |
| DEBUG [4]          | 39.72        | -            |
| Moment-DETR [3]    | 36.22        | 21.15        |
| VSLNet [11]        | 43.22        | <u>26.16</u> |
| EMB [2]            | <u>44.81</u> | 26.07        |
| QD-DETR [5]        | 38.11        | 21.47        |
| TR-DETR [7]        | 33.14        | 17.88        |
| <b>HERO (Ours)</b> | <b>46.14</b> | <b>27.89</b> |

### 1.3. Ablation Study on $\lambda_{RS}$ and $\lambda_{CL}$

Table 3 examines the effect of the relevance score loss ( $L_{RS}$ ) and the contrastive learning loss ( $L_{CL}$ ), with the base grounding loss  $L_{TSGV}$  fixed at a coefficient of 1. We first introduce  $L_{RS}$  while keeping other components unchanged. Results show that  $\lambda_{RS} = 0.1$  achieves the best performance overall. Building upon this, we additionally introduce  $L_{CL}$  and observe that  $\lambda_{CL} = 0.01$  yields the best R1@0.5, while  $\lambda_{CL} = 0.1$  attains the best R1@0.7 with only a minor 0.27% decrease at R1@0.5. Therefore, we adopt  $\lambda_{RS} = 0.1$  and  $\lambda_{CL} = 0.1$  as our final setting, which provides a good trade-off across both evaluation thresholds.

## 2. Additional Visualization Results

Figure 1 presents per-sample qualitative comparisons between our HERO and the EMB [2] baseline on the

Table 3. Performance comparison across different values of  $\lambda_{RS}$  and  $\lambda_{CL}$ . **Bold** and underlined numbers indicate the best and second-best results, respectively.

| Value | $\lambda_{RS}$ |              | $\lambda_{CL}$ |              |
|-------|----------------|--------------|----------------|--------------|
|       | R1@0.5         | R1@0.7       | R1@0.5         | R1@0.7       |
| 0.01  | 42.98          | 25.07        | <b>45.78</b>   | 23.73        |
| 0.1   | <b>45.21</b>   | <b>26.83</b> | 45.51          | <b>27.2</b>  |
| 1     | 44.23          | <u>25.78</u> | 44.65          | <u>26.59</u> |
| 10    | <u>44.95</u>   | 25.63        | <u>45.6</u>    | 26.34        |

Charades-OV dataset. The results illustrate the performance degradation of EMB under open-vocabulary conditions, often leading to incorrect grounding. In contrast, HERO consistently provides accurate localization, demonstrating enhanced robustness and generalization to novel linguistic expressions.

## References

- [1] Jiachang Hao, Haifeng Sun, Pengfei Ren, Jingyu Wang, Qi Qi, and Jianxin Liao. Can shuffling video benefit temporal bias problem: a novel training framework for temporal grounding. In *Proceedings of European Conference on Computer Vision*, pages 130–147, 2022. 1
- [2] Jiabo Huang, Hailin Jin, Shaogang Gong, and Yang Liu. Video activity localisation with uncertainties in temporal boundary. In *Proceedings of European Conference on Computer Vision*, pages 724–740, 2022. 1
- [3] Mohit Bansal Jie Lei, Tamara L Berg. Detecting moments and highlights in videos via natural language queries. *Advances in Neural Information Processing Systems*, 34: 11846–11858, 2021. 1
- [4] Chujie Lu, Long Chen, Chilie Tan, Xiaolin Li, and Jun Xiao. Debug: A dense bottom-up grounding approach for natural language video localization. In *Proceedings of Conference on Empirical Methods in Natural Language Processing and International Joint Conference on Natural Language Processing (EMNLP-IJCNLP)*, pages 5144–5153, 2019. 1
- [5] WonJun Moon, Sangeek Hyun, SangUk Park, Dongchan Park, and Jae-Pil Heo. Query-dependent video representation for moment retrieval and highlight detection. In *Proceedings of the IEEE Conference on Computer Vision and Pattern Recognition*, pages 23023–23033, 2023. 1
- [6] Jonghwan Mun, Minsu Cho, and Bohyung Han. Local-global video-text interactions for temporal grounding. In *Proceedings of the IEEE Conference on Computer Vision and Pattern Recognition*, pages 10810–10819, 2020. 1
- [7] Hao Sun, Mingyao Zhou, Wenjing Chen, and Wei Xie. Tr-detr: Task-reciprocal transformer for joint moment retrieval and highlight detection. In *Proceedings of the AAAI Conference on Artificial Intelligence*, pages 4998–5007, 2024. 1
- [8] Huijuan Xu, Kun He, Bryan A Plummer, Leonid Sigal, Stan Sclaroff, and Kate Saenko. Multilevel language and vision integration for text-to-clip retrieval. In *Proceedings of the AAAI Conference on Artificial Intelligence*, pages 9062–9069, 2019. 1
- [9] Xun Yang, Fuli Feng, Wei Ji, Meng Wang, and Tat-Seng Chua. Deconfounded video moment retrieval with causal intervention. In *Proceedings of the International ACM SIGIR Conference on Research and Development in Information retrieval*, pages 1–10, 2021. 1
- [10] Runhao Zeng, Haoming Xu, Wenbing Huang, Peihao Chen, Mingkui Tan, and Chuang Gan. Dense regression network for video grounding. In *Proceedings of the IEEE Conference on Computer Vision and Pattern Recognition*, pages 10287–10296, 2020. 1
- [11] H. Zhang, A. Sun, W. Jing, L. Zhen, J. T. Zhou, and R. S. M. Goh. Natural language video localization: A revisit in span-based question answering framework. *IEEE Transactions on Pattern Analysis and Machine Intelligence*, 2021. 1
- [12] Songyang Zhang, Houwen Peng, Jianlong Fu, and Jiebo Luo. Learning 2d temporal adjacent networks for moment localization with natural language. In *Proceedings of the AAAI Conference on Artificial Intelligence*, pages 12870–12877, 2020. 1
